# Supplementary material for: Protracted Course of SARS-CoV-2 Pneumonia in Severely Immunocompromised Patients
Source: Research Square preprint supplement (doi:10.21203/rs.3.rs-2036036/v1), 2022-09-12
Supplement: Supplementary file 1 [file df76800a7c489ab29df8c949.docx]

**Supplementary Materials**

**Article title:** Protracted Course of SARS-CoV-2 Pneumonia in Severely Immunocompromised Patients

**Journal name**: *Infection*

**Author names and affiliation**

Jeongjae Lee1,2*, A Reum Kim2*, Sung Woon Kang2, Euijin Chang2, Seongman Bae2, Jiwon Jung2, Min Jae Kim2, Yong Pil Chong2, Sang-Oh Lee2, Sang-Ho Choi2, Yang Soo Kim2, Sung-Han Kim2†

1Department of Internal Medicine, Asan Medical Center, University of Ulsan College of Medicine, Seoul, South Korea

2Department of Infectious Disease, Asan Medical Center, University of Ulsan College of Medicine, Seoul, South Korea

* These authors are joint first authors.

† **Corresponding author:**

Sung-Han Kim, MD

Department of Infectious Diseases

Asan Medical Center, University of Ulsan College of Medicine

88, Olympic-ro-43-gil, Songpa-gu, Seoul, 05505, South Korea

Tel: +82-2-3010-3305

Fax: +82-2-3010-6970

E-mail: kimsunghanmd@hotmail.com

**Table S1**. Characteristics according to COVID-19-related death stratified by dominant variant of the period

| **Characteristic** | **Non-omicron-dominant era** | | | **Omicron-dominant era** | | |
| --- | --- | --- | --- | --- | --- | --- |
| **COVID-19-related death** (n = 41) | **No COVID-19-related death** (n = 308) | **P value** | **COVID-19-related death** (n = 13) | **No COVID-19-related death** (n = 105) | **P value** |
| **Age,** median (IQR) years | 76 (70-85) | 62 (53-70) | < 0.001 | 75 (66-85) | 62 (52-69) | 0.001 |
| **Sex** |  |  |  |  |  |  |
| Female | 17 (41) | 116 (38) | 0.76 | 5 (38) | 46 (44) | 0.94 |
| Male | 24 (59) | 192 (62) |  | 8 (62) | 59 (56) |  |
| **Comorbidity** |  |  |  |  |  |  |
| BMI ≥ 25kg/m² | 15 (37) | 140 (46) | 0.37 | 3 (23) | 27 (26) | > 0.99 |
| Smoking a | 13 (32) | 83 (27) | 0.65 | 5 (39) | 22 (22) | 0.29 |
| Diabetes | 10 (24) | 94 (31) | 0.53 | 2 (15) | 40 (38) | 0.19 |
| Hypertension | 22 (54) | 150 (49) | 0.67 | 6 (46) | 50 (48) | > 0.99 |
| Cardiovascular disease | 12 (29) | 34 (11) | 0.003 | 4 (31) | 23 (22) | 0.71 |
| Chronic kidney disease | 10 (24) | 19 (6) | < 0.001 | 2 (15) | 51 (49) | 0.05 |
| Chronic lung disease | 5 (12) | 11 (4) | 0.04 | 2 (15) | 14 (13) | > 0.99 |
| Chronic liver disease | 2 (5) | 24 (8) | 0.73 | 1 (8) | 11 (11) | > 0.99 |
| Solid tumor b | 3 (7) | 12 (4) | 0.55 | 5 (39) | 10 (10) | 0.01 |
| **Severely immunocompromised condition** | 6 (15) | 15 (5) | 0.03 | 5 (39) | 60 (57) | 0.33 |
| Hematologic malignancy n/N (%) | 3/6 (50) | 6/15 (40) |  | 5/5 (100) | 15/60 (25) c |  |
| SOT n/N (%) | 3 /6 (50) | 9/15 (60) |  | 0/5 (0) | 45/60 (75) c |  |
| Primary immunodeficiency n/N (%) | 0/6 (0) | 0/15 (0) |  | 0/5 (0) | 1 (0) |  |

Data are presented as no. (%) of individuals unless otherwise indicated. Abbreviations: IQR, interquartile range; BMI, body mass index; SOT, solid organ transplantation

a Current or previous, b Diagnosis or treatment withing 6 months, c One patient who had hematologic malignancy and subsequently received SOT is included.

**Table S2**. Risk factors for 90-day mortality due to SARS-CoV-2 pneumonia stratified by dominant variant of the period.

| **Risk factor**  **(Non-omicron-dominant era)** | **Univariate analysis** | | **Multivariate analysis** | |
| --- | --- | --- | --- | --- |
| **OR (95% CI)** | **P value** | **aOR (95% CI)** | **P value** |
| **Age** | 1.14 (1.09-1.19) | < 0.001 | 1.16 (1.11-1.22) | < 0.001 |
| **Cardiovascular disease** | 3.33 (1.56-7.14) | 0.002 |  |  |
| **Chronic kidney disease** | 4.91 (2.10-11.49) | < 0.001 |  |  |
| **Chronic lung disease** | 3.75 (1.23-11.40) | 0.02 |  |  |
| **Solid tumor** | 1.95 (0.53-7.21) | 0.32 |  |  |
| **Severely immunocompromised condition** | 3.35 (1.22-9.19) | 0.02 | 8.78 (2.62-29.43) | < 0.001 |
| **Risk factor**  **(Omicron-dominant era)** | **Univariate analysis** | | **Multivariate analysis** | |
| **OR (95% CI)** | **P value** | **aOR (95% CI)** | **P value** |
| **Age** | 1.10 (1.04-1.16) | 0.001 | 1.12 (1.04-1.20) | 0.004 |
| **Solid tumor** | 5.94 (1.63-21.64) | 0.007 | 8.57 (1.60-45.86) | 0.01 |
| **Severely immunocompromised condition** | 0.47 (0.14-1.53) | 0.21 | 2.40 (0.42-13.64) | 0.32 |

Abbreviations: OR, odds ratio; aOR, adjusted odds ratio; CI, confidence interval

**Fig. S1**


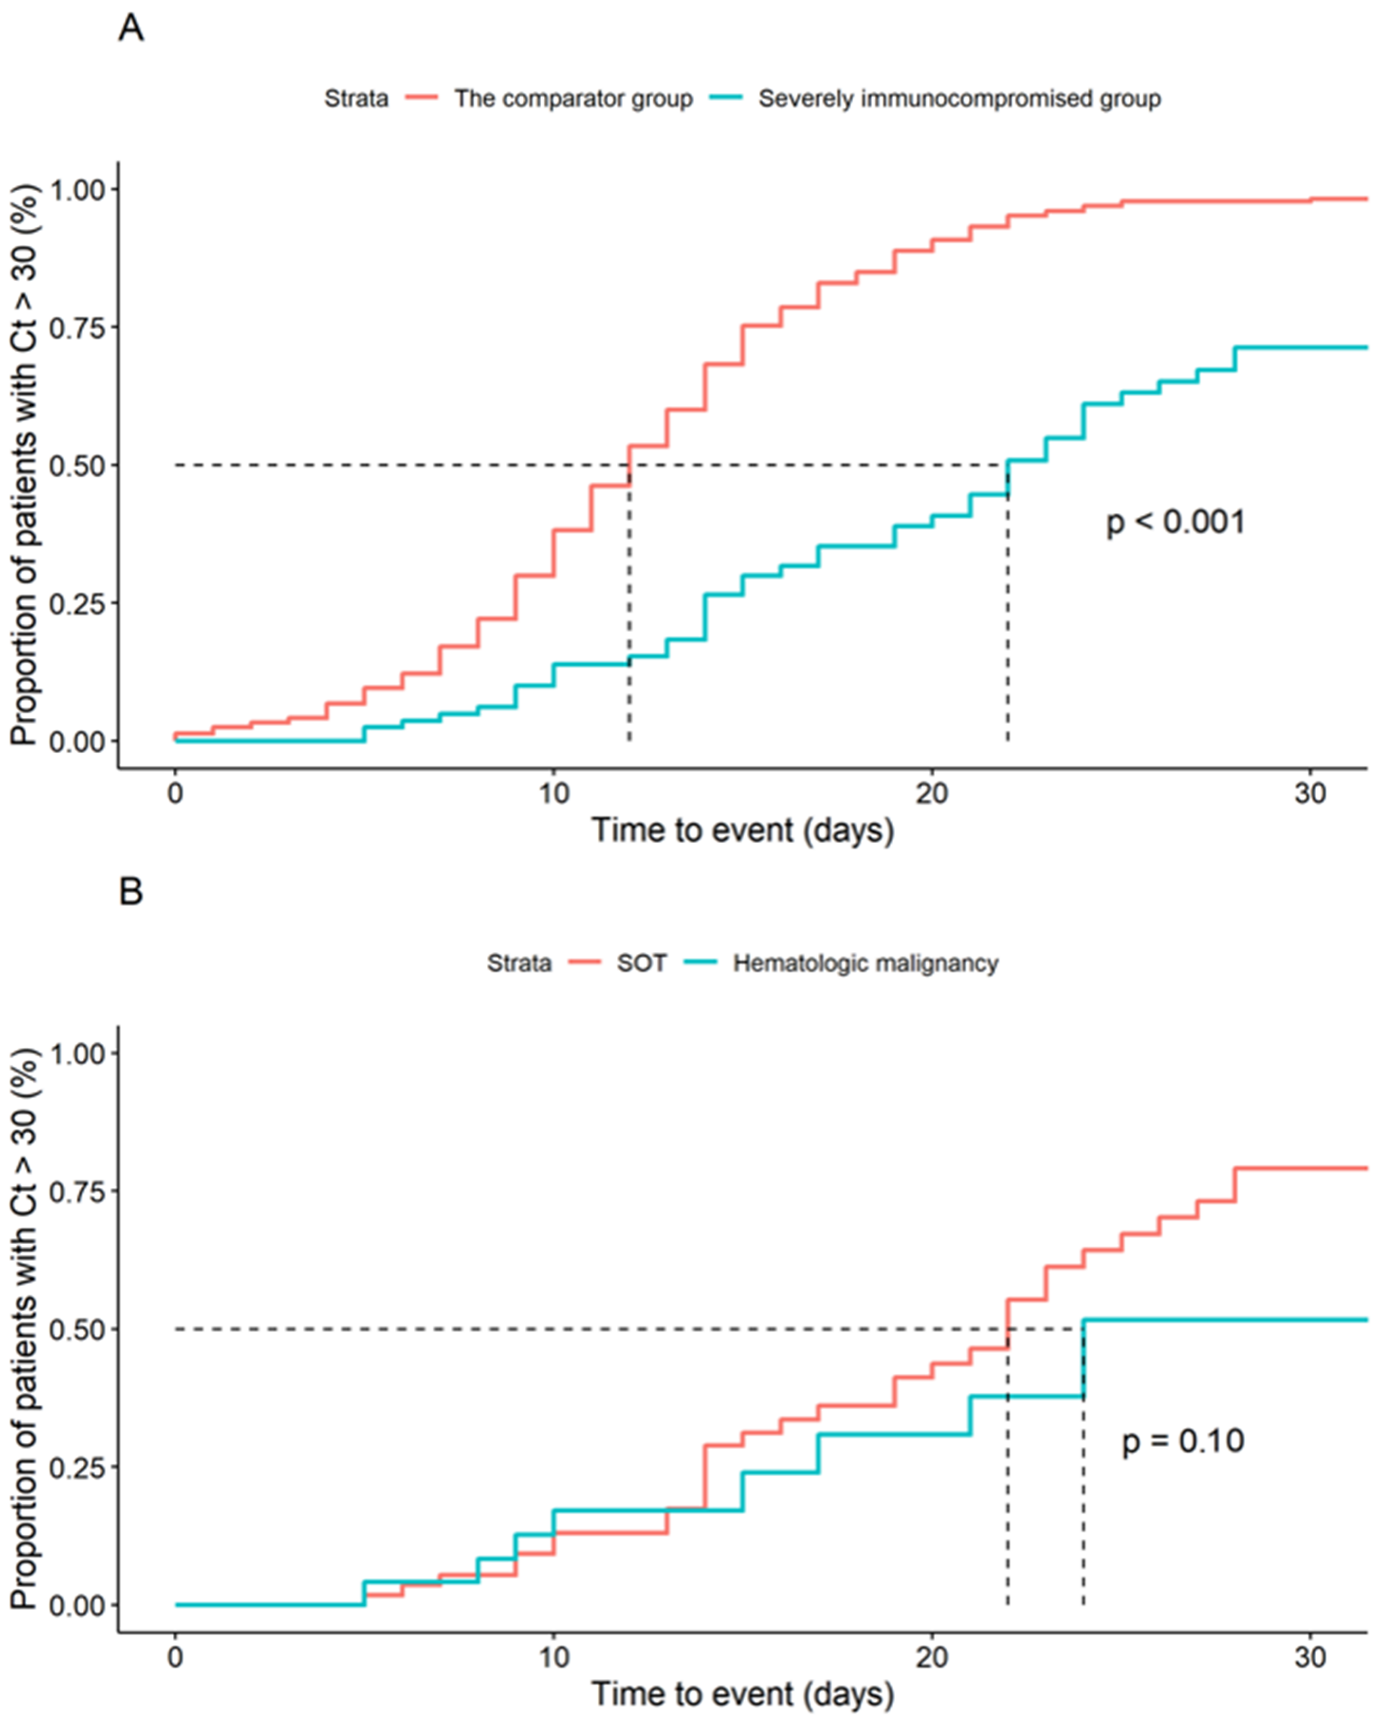
**V**iral clearance rates (A) in the severely immunocompromised comparator groups, and (B) in SOT recipients and patients with hematologic malignancies.

**Fig. S2**


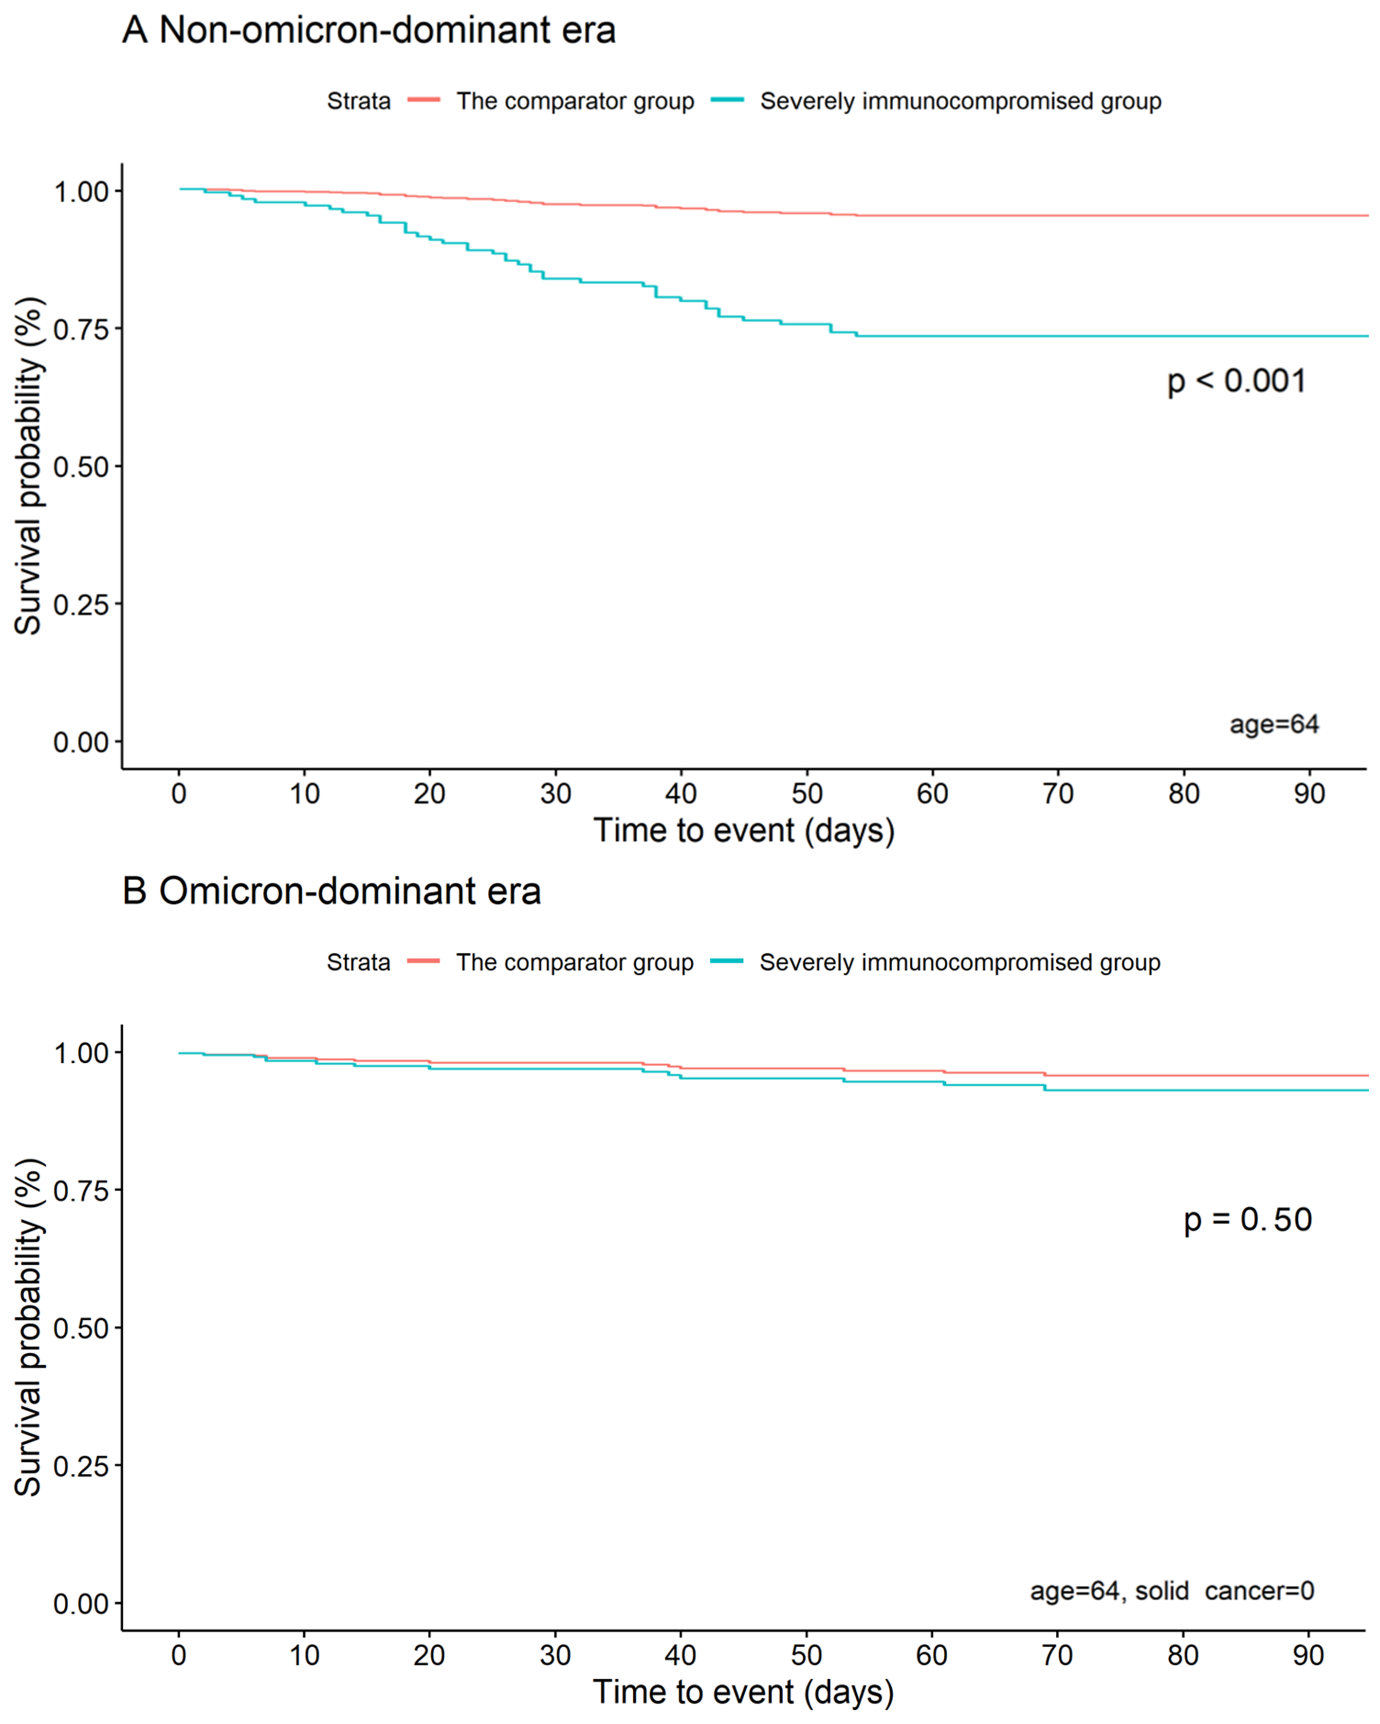
**A**djusted survival curves in the two groups stratified by dominant variant of the period: (A) non-omicron-dominant era and (B) omicron-dominant era.
